# Supplementary material
Source: publisher figshare collection journal article supplement (https://aacr.figshare.com/ndownloader/files/40374624)
Supplement: Supplementary file 1 [file 40374624]

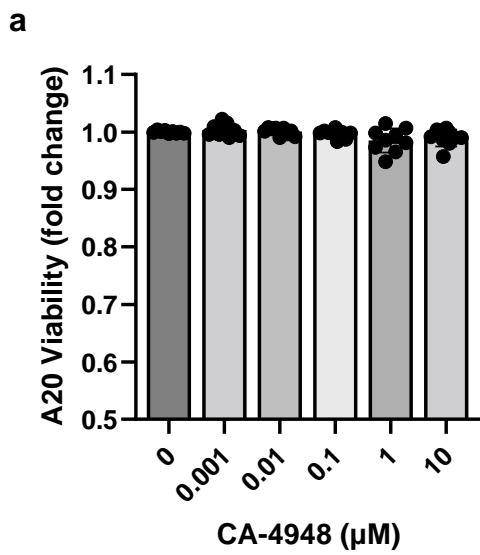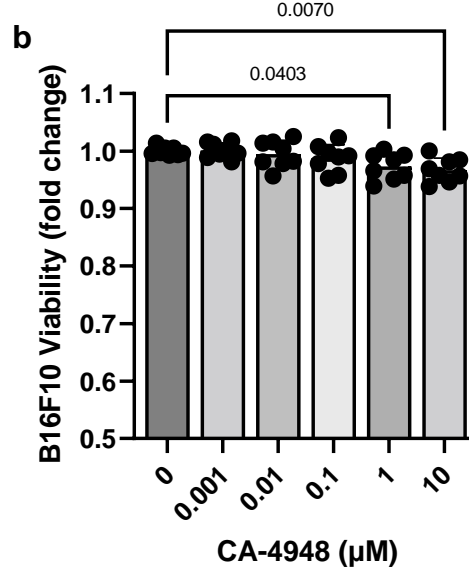

Supplemental Figure 4. CA-4948 viability assessment in A20 and B16F10 cancer cells. (a) Viability of A20 cancer cells following a 5-day treatment with CA-4948 at different concentrations. N=8 per dose, mean values shown with error bars = standard deviation. (b) Viability of B16F10 cancer cells following a 5-day treatment with CA-4948 at different concentrations. N=8 per dose, mean values shown with error bars = standard deviation. P-values calculated by ordinary one-way ANOVA with Dunnett's multiple comparisons test.
